# Supplementary material for: Charge-balanced terpolymer poly(diethylaminoethyl methacrylate-hydroxyethyl methacrylate-2-acrylamido-2-methyl-propanesulfonic acid) hydrogels and cryogels: scaling parameters and correlation with composition
Source: Royal Society of Chemistry journal article supplement (doi:10.1039/d0sm01306d), 2020-01-01
Supplement: d0sm01306d1.pdf [file d0sm01306d1.pdf]

## Supporting information for

### Charge-balanced terpolymer poly(diethylaminoethyl methacrylate-hydroxyethyl methacrylate-2-acrylamido-2-methyl-propanesulfonic acid) hydrogels and cryogels: Scaling parameters and correlation with composition

Nur Sena OKTEN<sup>a,b</sup>, and Nermin ORAKDOGEN<sup>a\*</sup>

<sup>a</sup>Istanbul Technical University, Department of Chemistry, Soft Materials Research Laboratory,

34469, Maslak, Istanbul, Turkey.

<sup>b</sup>Istanbul Kultur University, Department of Civil Engineering, 34158, Bakırkoy, Istanbul, Turkey.

\*Correspondence to: Prof. Nermin Orakdogen (e-mail: [orakdogen@itu.edu.tr](mailto:orakdogen@itu.edu.tr))

#### Crosslinked terpolymer network concentration and density of terpolymer PDHA gels

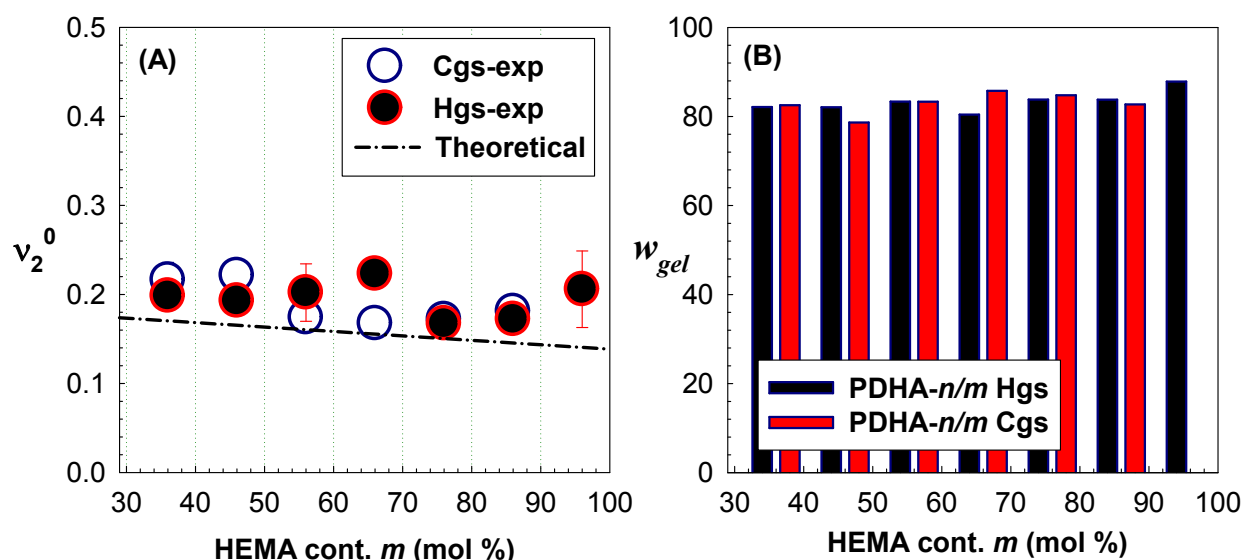

**Figure S1.** (A) Experimental and theoretical  $v_2^0$  values and (B) gel fraction  $w_{gel}$  of PDHA- $n/m$  Hgs and Cgs shown as a function of HEMA mol content in the feed.

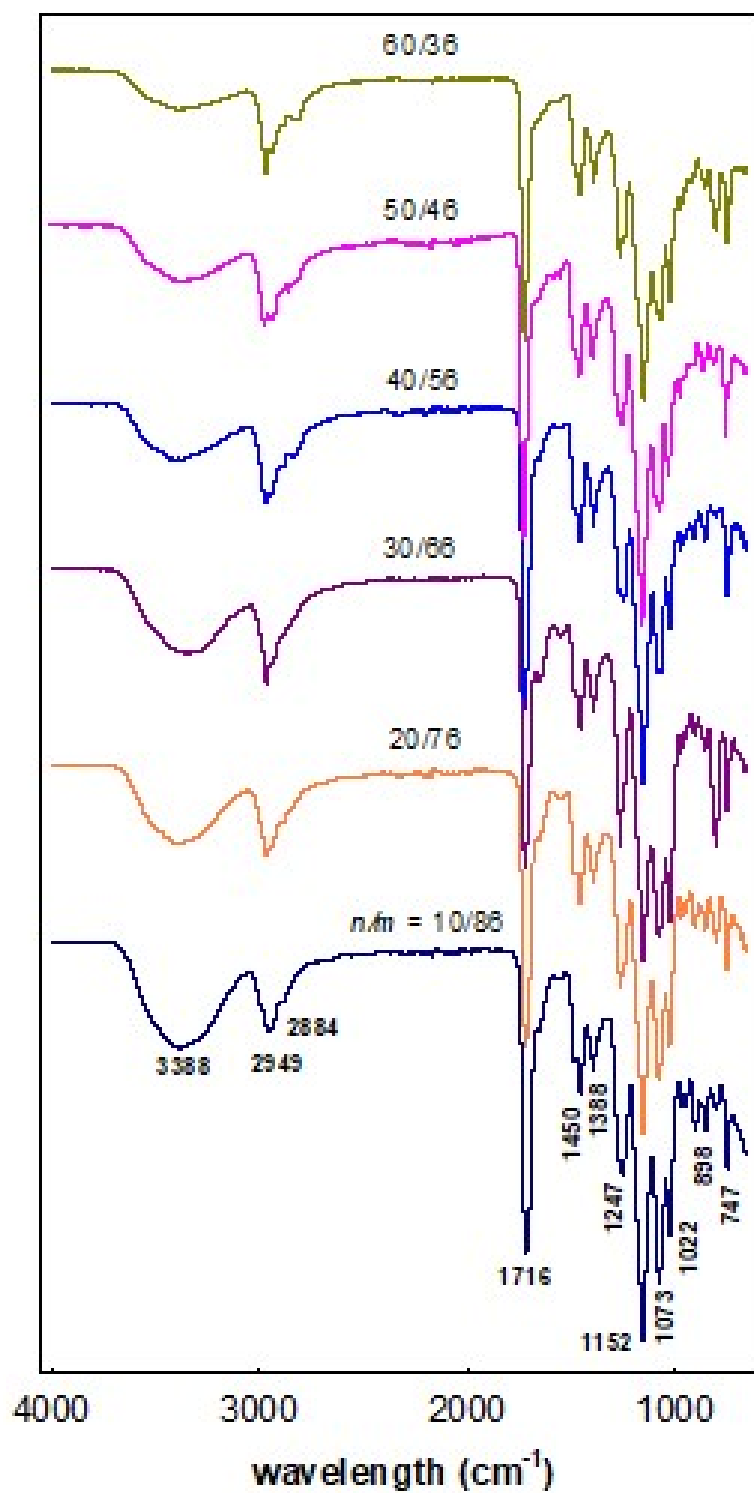

**Figure S2.** ATR-FTIR spectra of terpolymer PDHA-*n/m* cryogel samples prepared with varying *n/m* ratios.
